# Supplementary material for: Novel Organic Salts Based on Mefloquine: Synthesis, Solubility, Permeability, and In Vitro Activity against Mycobacterium tuberculosis
Source: MDPI journal article supplement (doi:10.3390/molecules27165167), 2022-08-13
Supplement: s1 [file s1]

## Supporting information

### Novel organic salts based on mefloquine: synthesis, solubility, permeability and *in vitro* activity against the *Mycobacterium tuberculosis*

#### NMR and FTIR Spectra

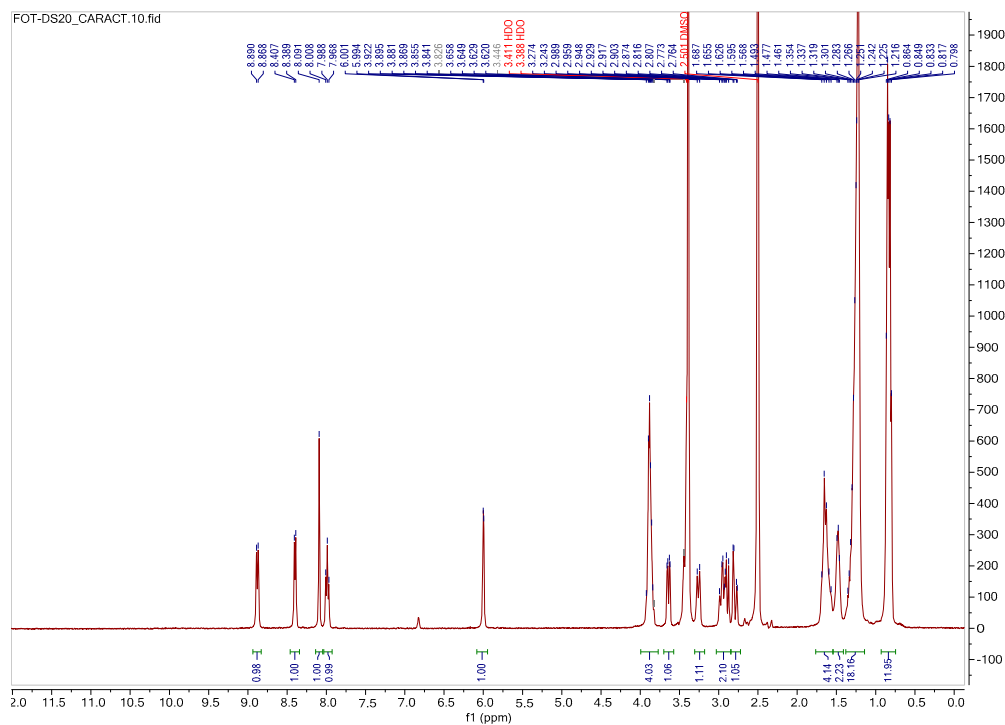

Figure S1. [MFLH][AOT]  $^1\text{H}$  NMR spectrum in  $\text{DMSO}-d_6$ .

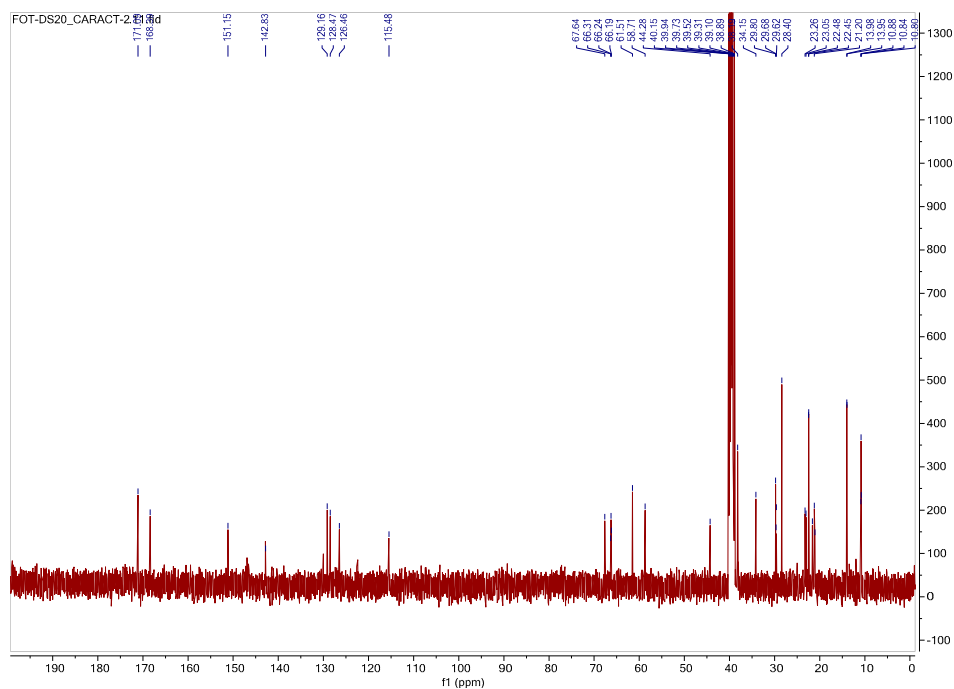

Figure S2. [MFLH][AOT]  $^{13}\text{C}$  NMR spectrum in  $\text{DMSO}-d_6$ .

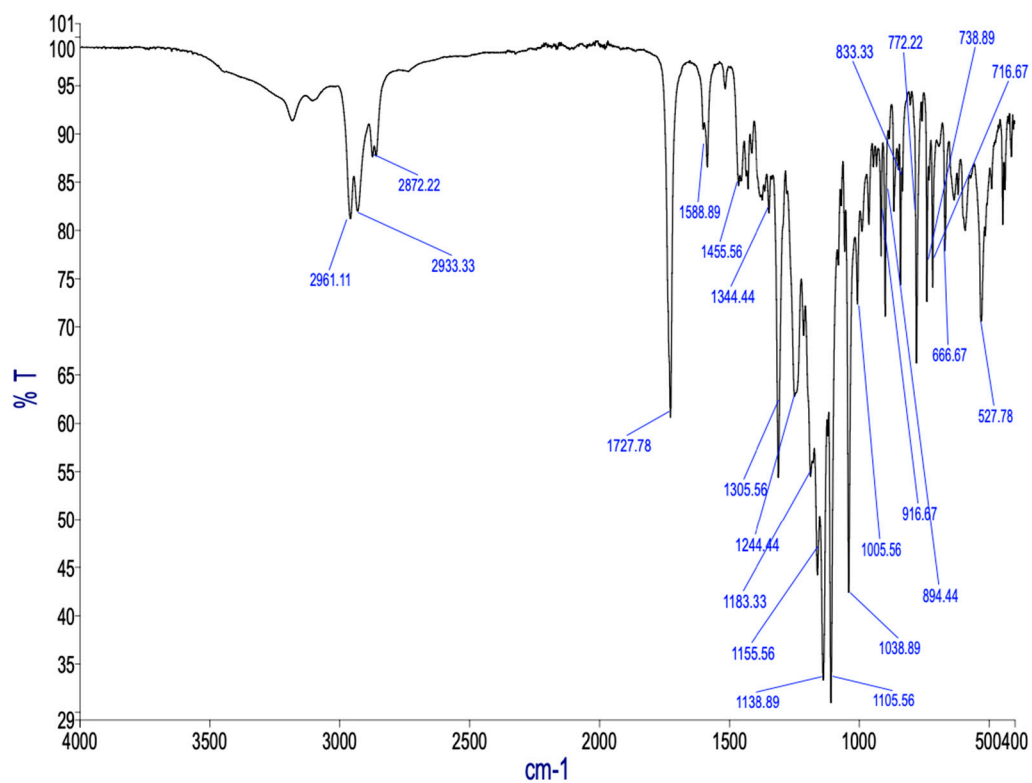

**Figure S3.** [MFLH][AOT] FTIR-ATR spectrum.

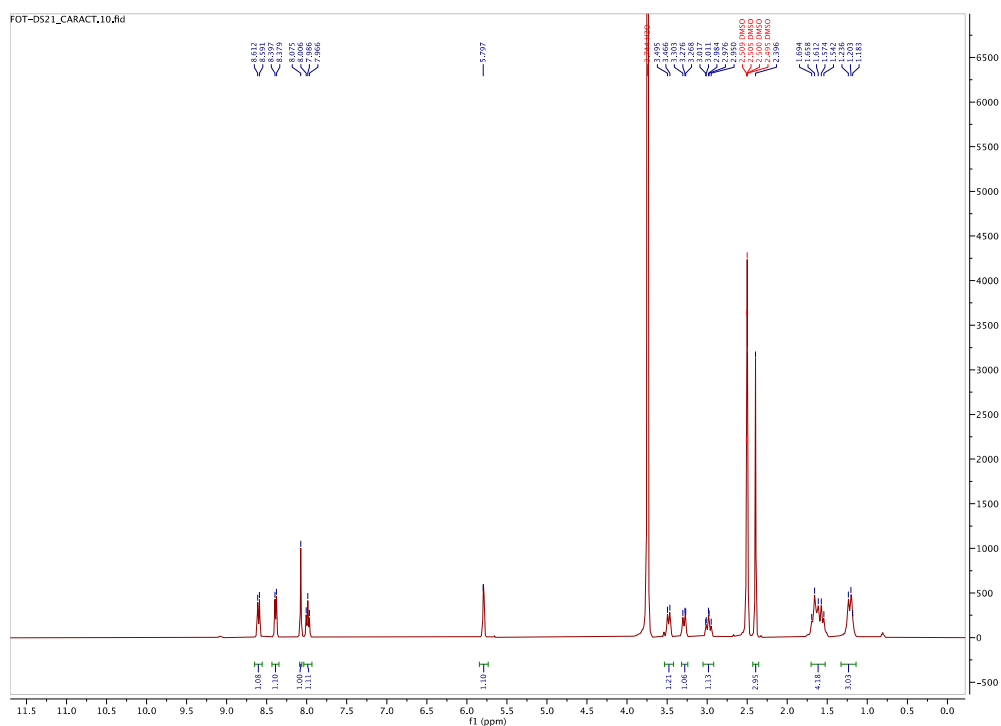

**Figure S4.** [MFLH][MsO] <sup>1</sup>H NMR spectrum in DMSO-*d*<sub>6</sub>.

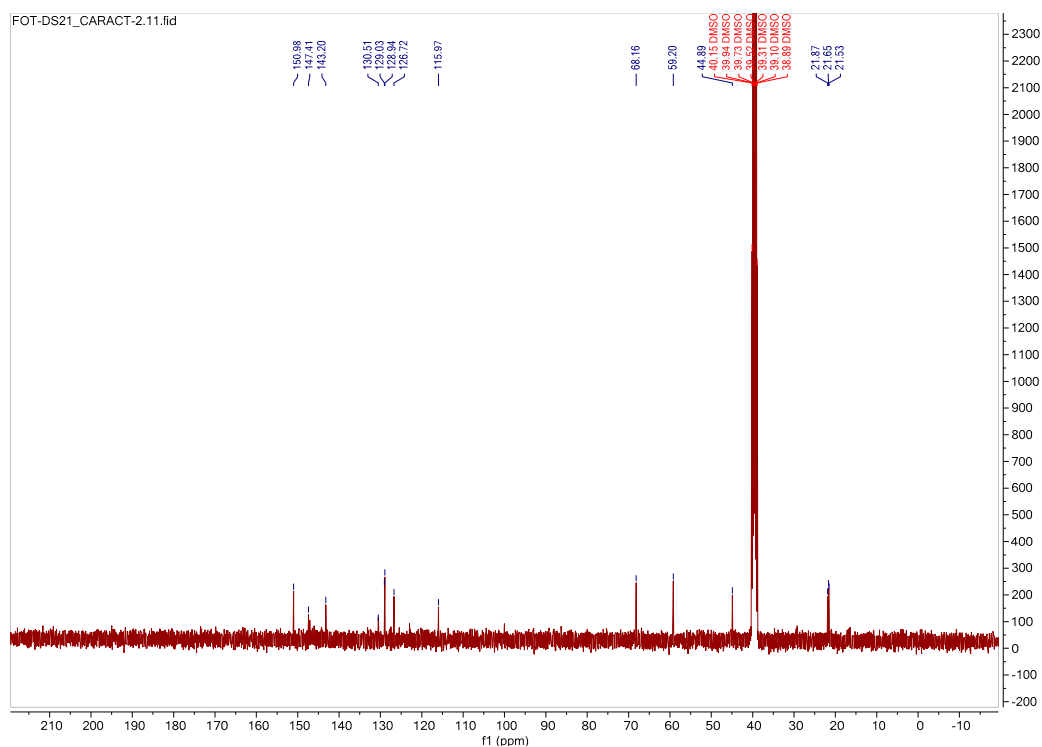

**Figure S5.** [MFLH][MsO]  $^{13}\text{C}$  NMR spectrum in  $\text{DMSO-}d_6$ .

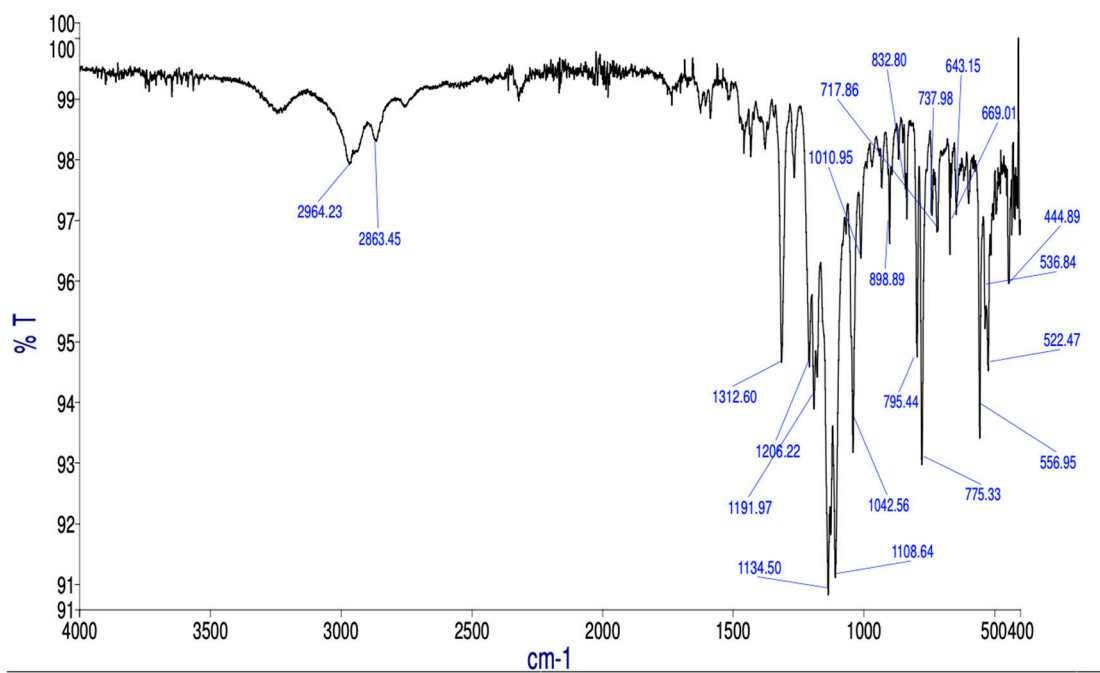

**Figure S6.** [MFLH][MsO] FTIR-ATR spectrum.

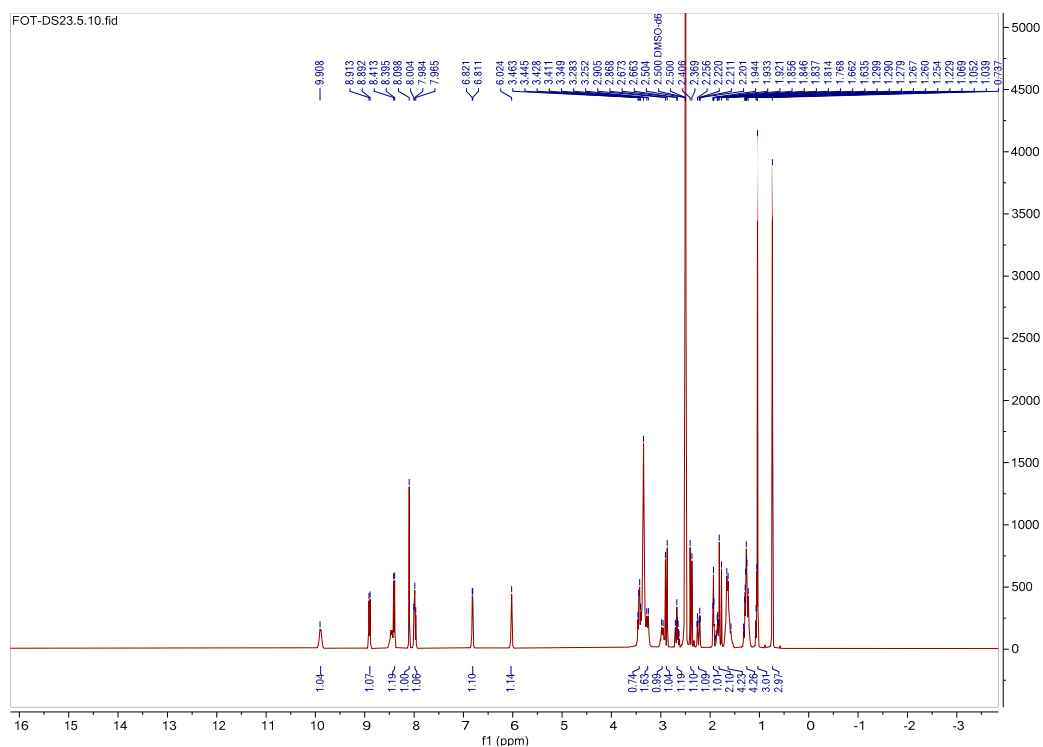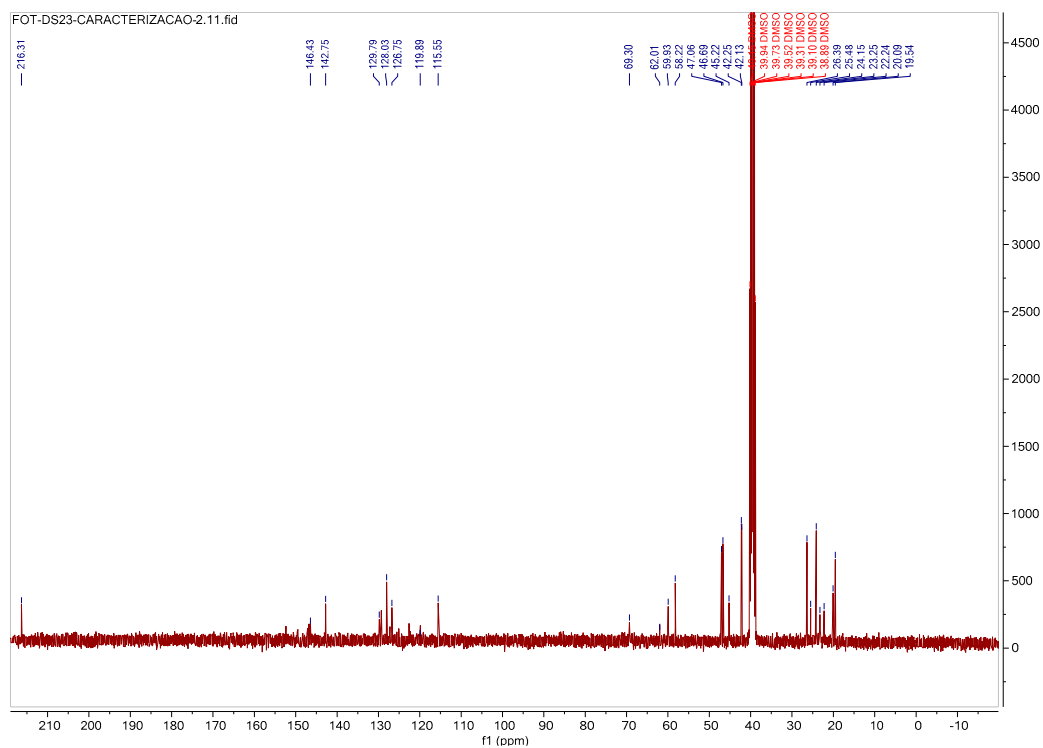

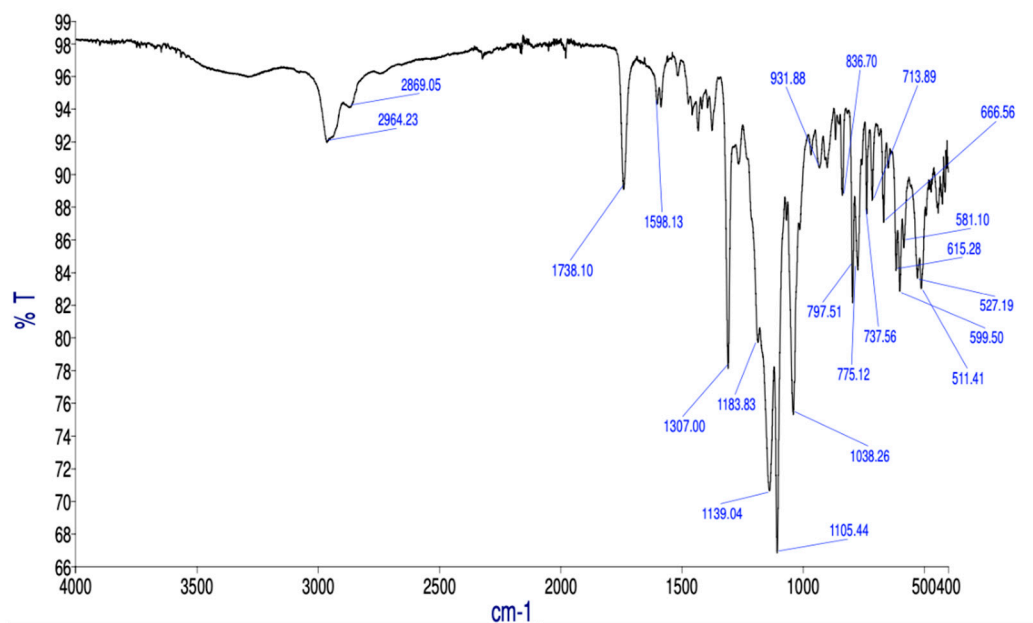

**Figure S9.** [MFLH][(1S)-CSA] FTIR-ATR spectrum.

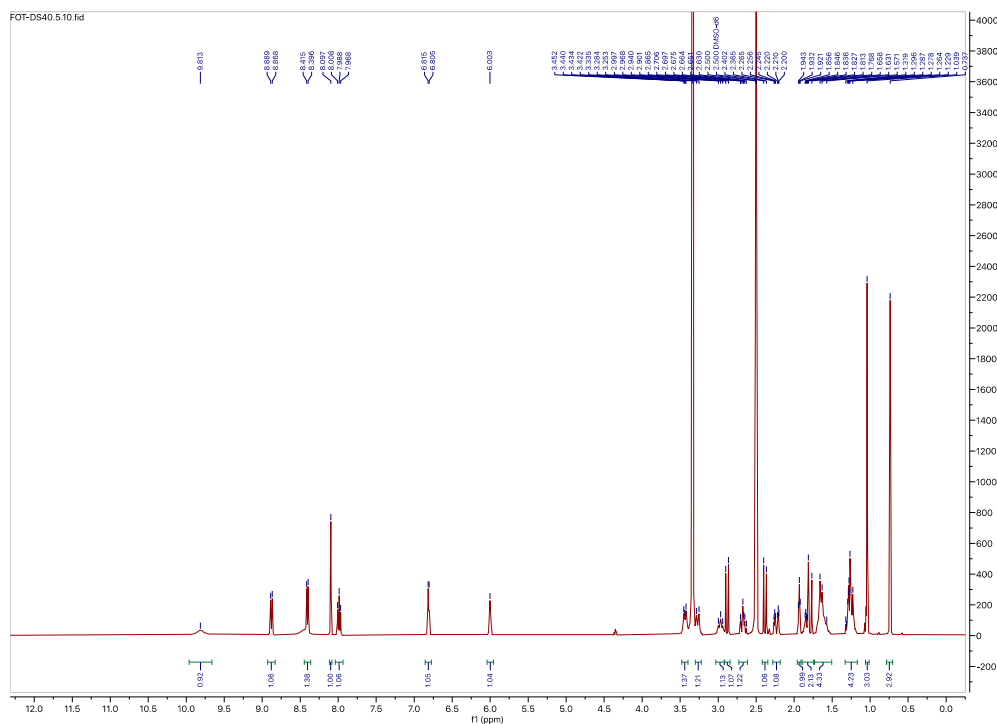

**Figure S10.** [MFLH][(1R)-CSA] <sup>1</sup>H NMR spectrum in DMSO-*d*<sub>6</sub>.

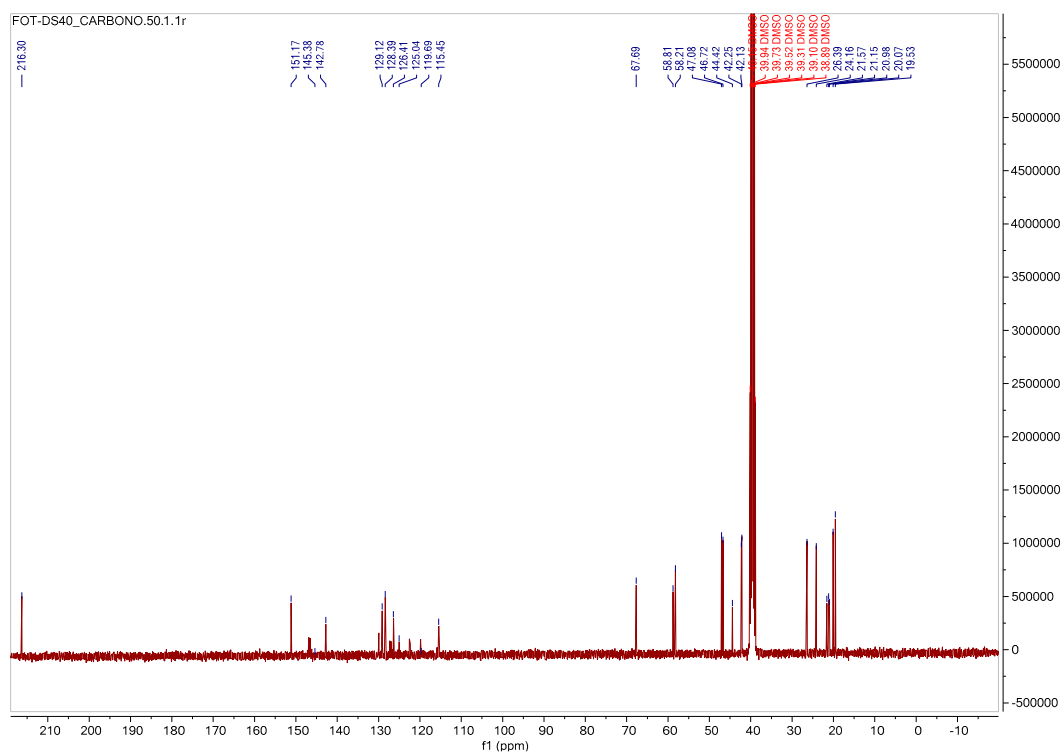

**Figure S11.** [MFLH][(1R)-CSA]  $^{13}\text{C}$  NMR spectrum in  $\text{DMSO}-d_6$ .

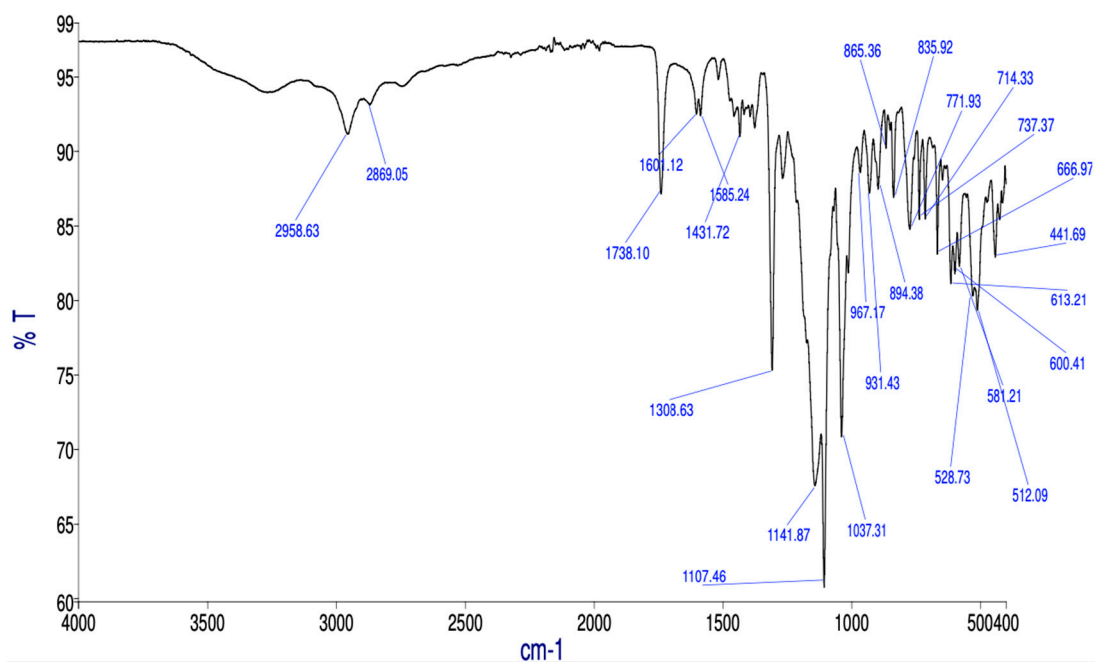

**Figure S12.** [MFLH][(1R)-CSA] FTIR-ATR spectrum.

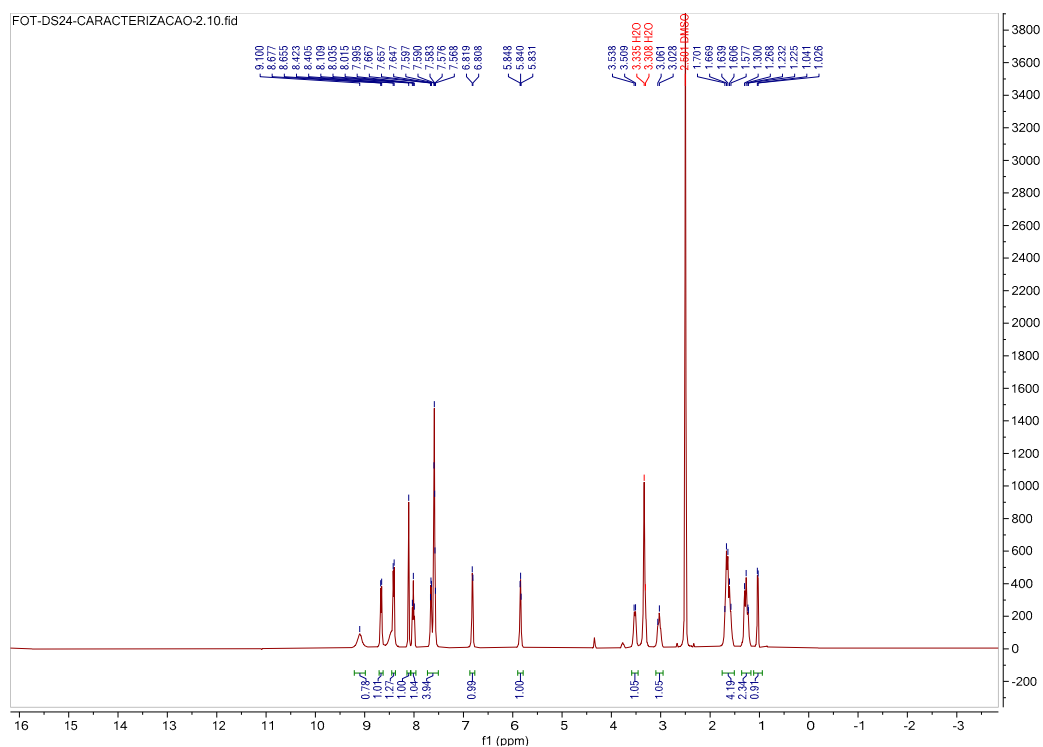

**Figure S13.** [MFLH][Sac]  $^1\text{H}$  NMR spectrum in  $\text{DMSO-}d_6$ .

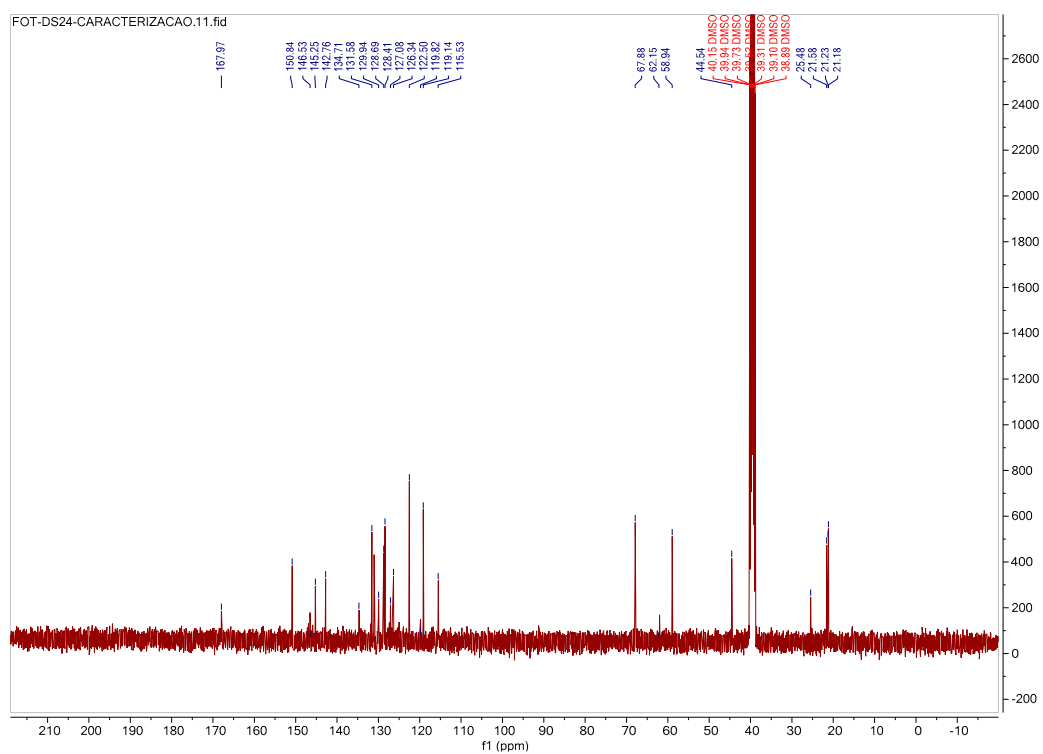

**Figure S14.** [MFLH][Sac]  $^{13}\text{C}$  NMR spectrum in  $\text{DMSO-}d_6$ .



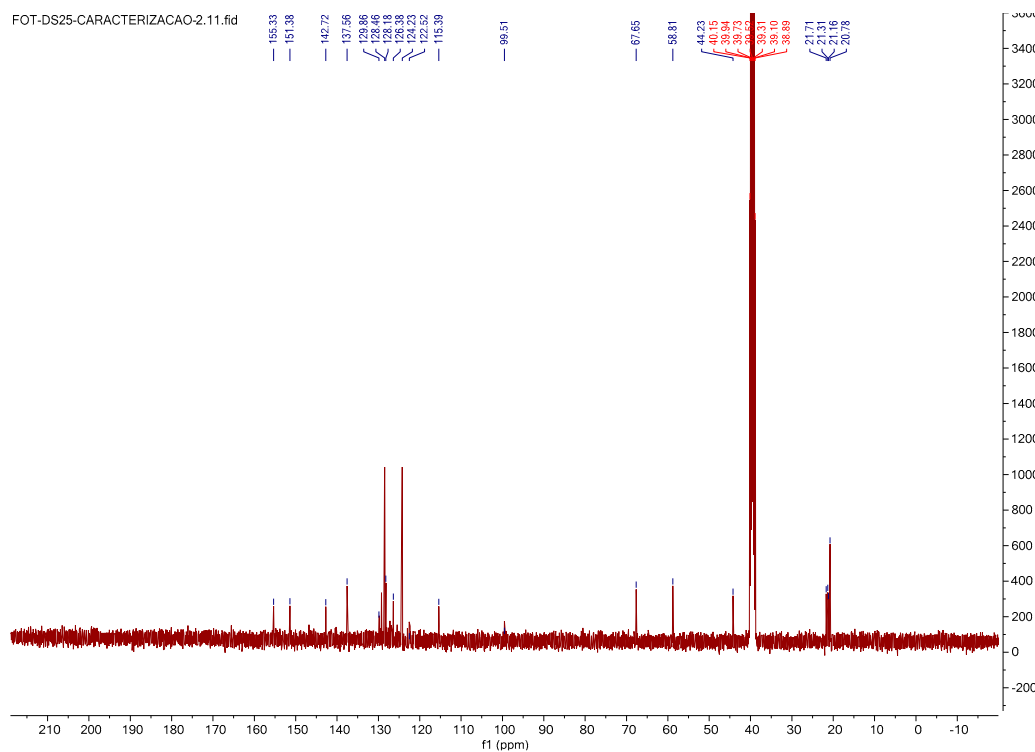

**Figure S17.** [MFLH][TsO]  $^{13}\text{C}$  NMR spectrum in  $\text{DMSO}-d_6$ .

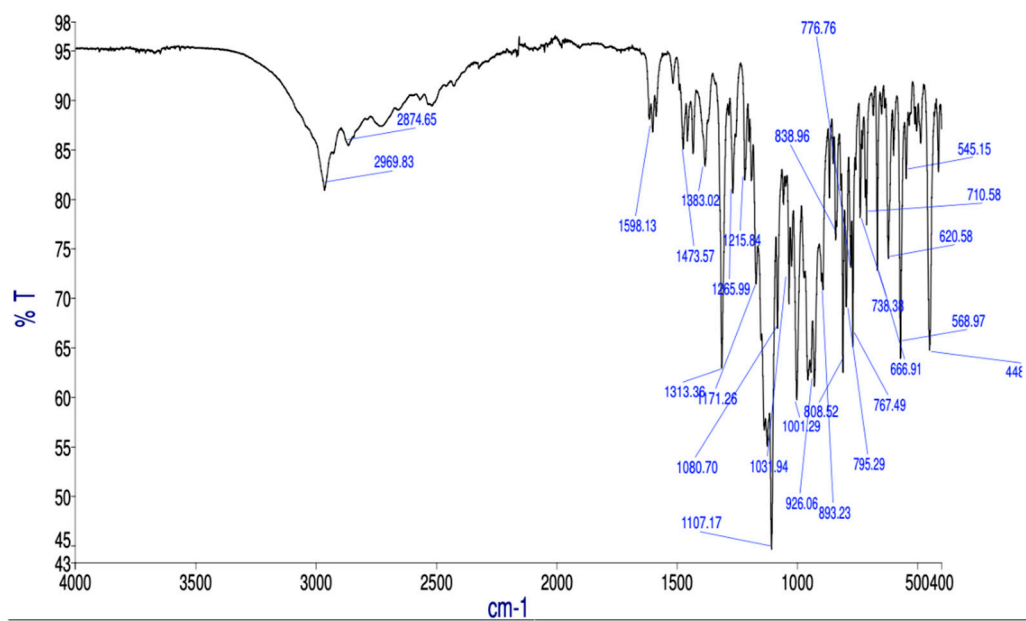

**Figure S18.** [MFLH][TsO] FTIR-ATR spectrum.

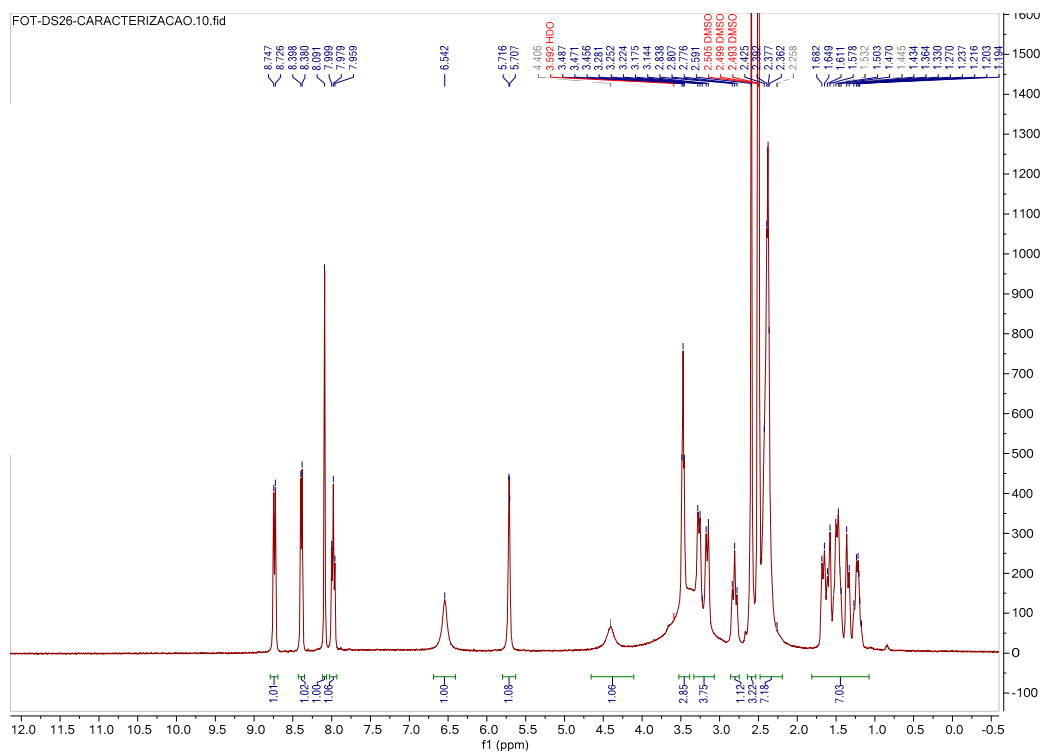

Figure S19. [MFLH][HEPES]  $^1\text{H}$  NMR spectrum in  $\text{DMSO}-d_6$ .

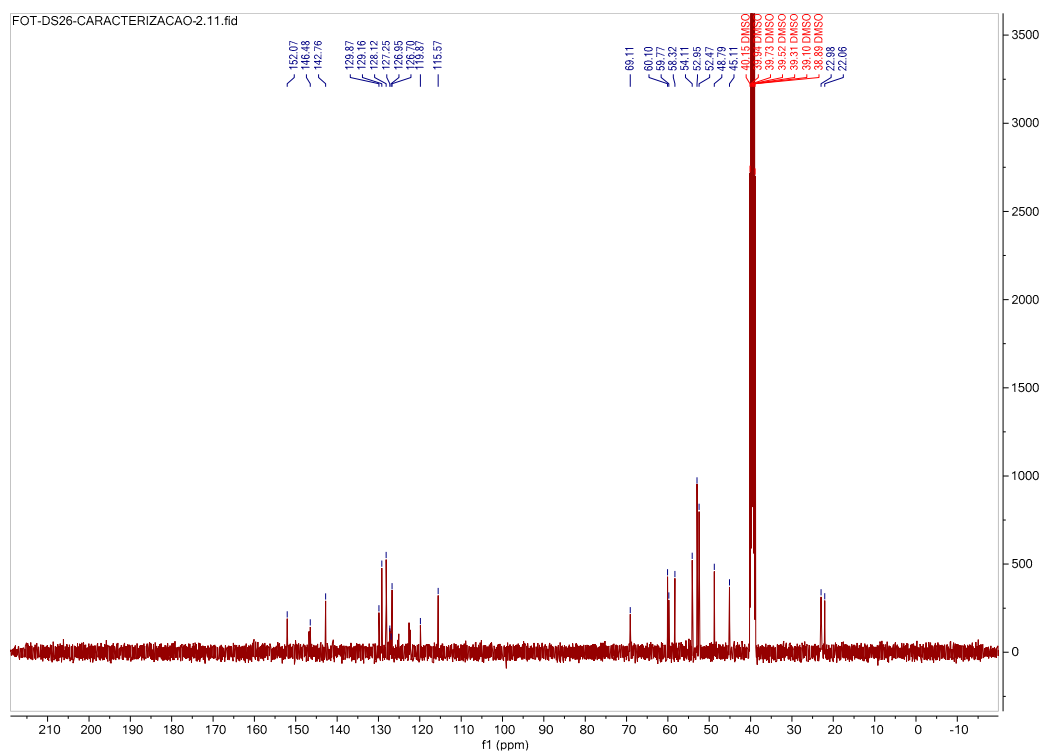

Figure S20. [MFLH][HEPES]  $^{13}\text{C}$  NMR spectrum in  $\text{DMSO}-d_6$ .

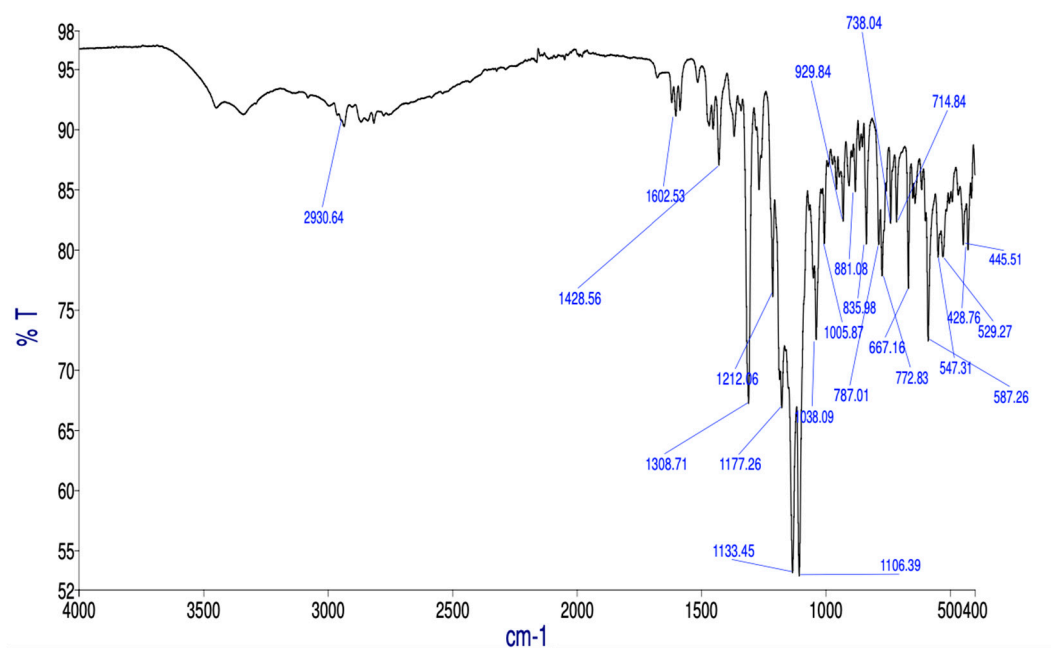

**Figure S21.** [MFLH][HEPES] FTIR-ATR spectrum.

### DSC thermograms

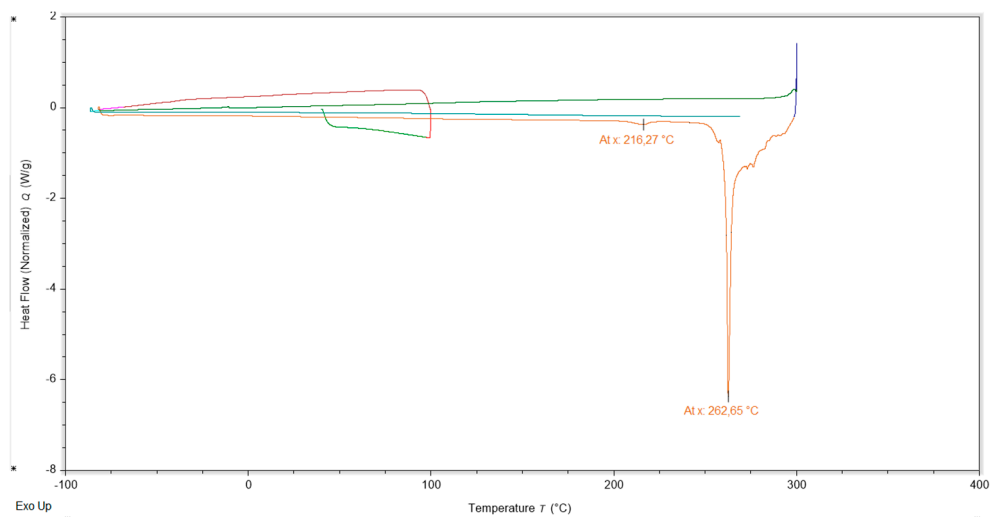

**Figure S22.** DSC thermogram of [MFLH][Cl].

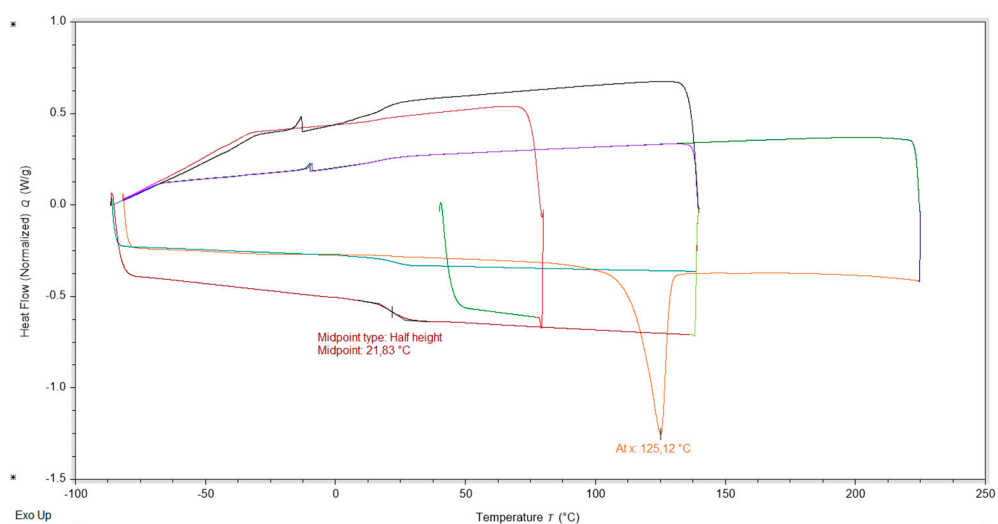

Figure S23. DSC thermogram of [MFLH][AOT].

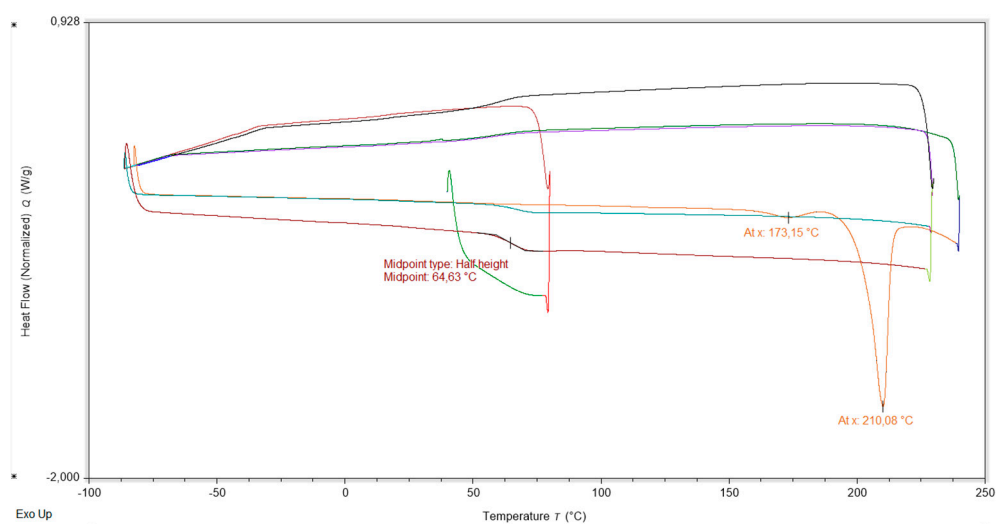

Figure S24. DSC thermogram of [MFLH][MsO].

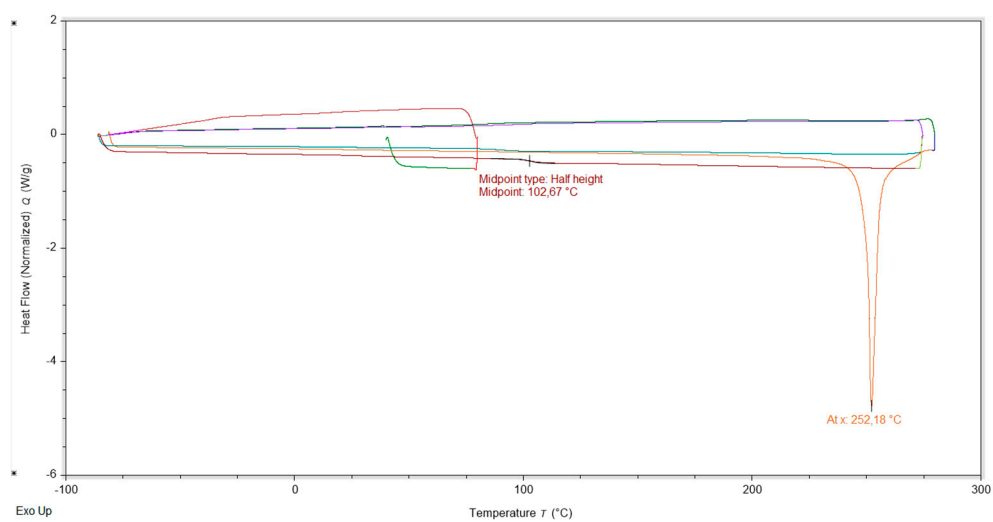

Figure S25. DSC thermogram of [MFLH][Sac].

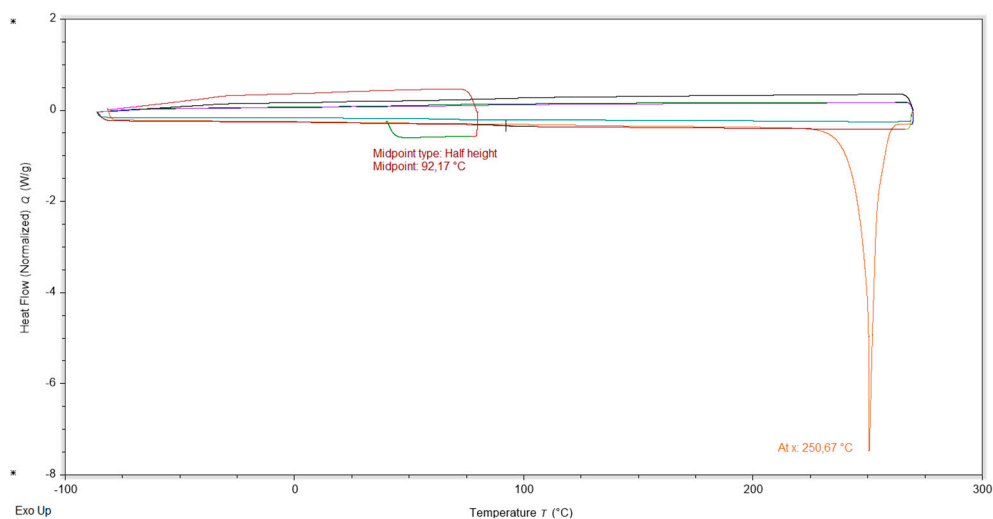

Figure S26. DSC thermogram of [MFLH][TsO].

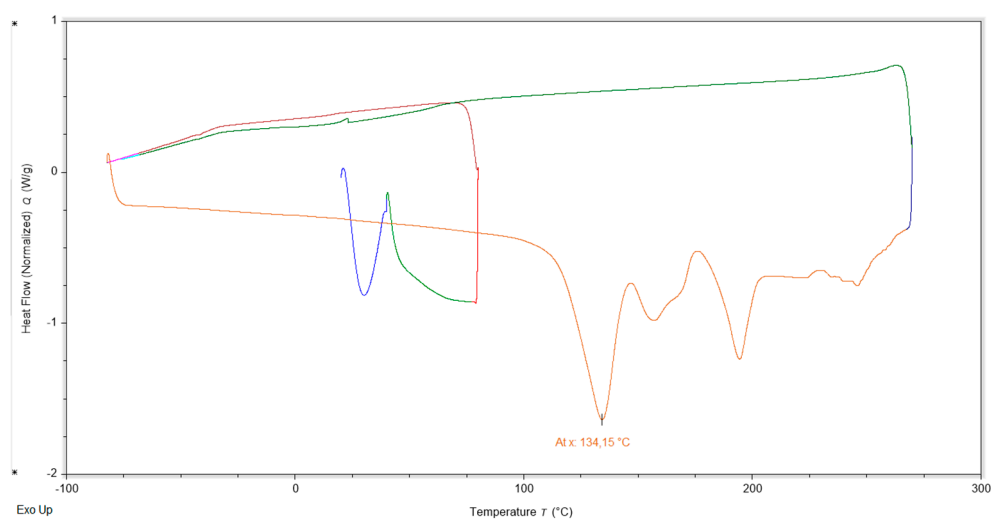

Figure S27. DSC thermogram of [MFLH][HEPES].

### Water solubility studies

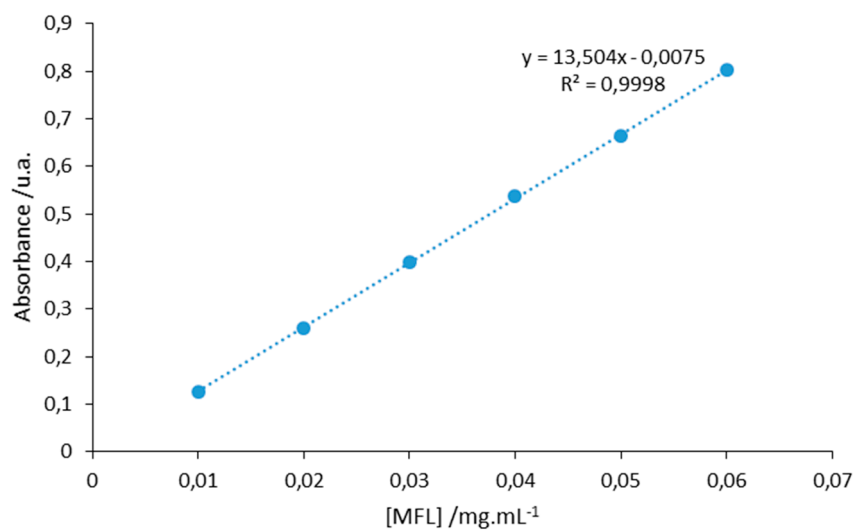

Figure S28. Calibration curve of Mefloquine in water.

*Permeability (P), diffusion (D) and partition coefficient (K<sub>a</sub>) studies*

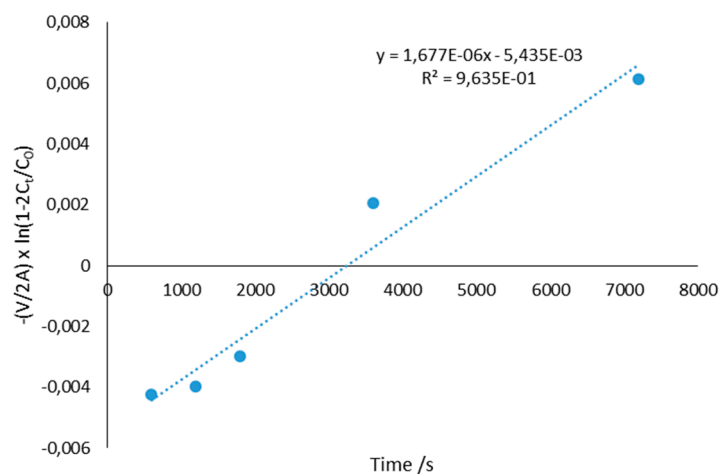

**Figure S29.** Plot of  $-(V/2A) \times \ln(1-2C_t/C_0)$  versus time (s) of [MFLH][Cl].

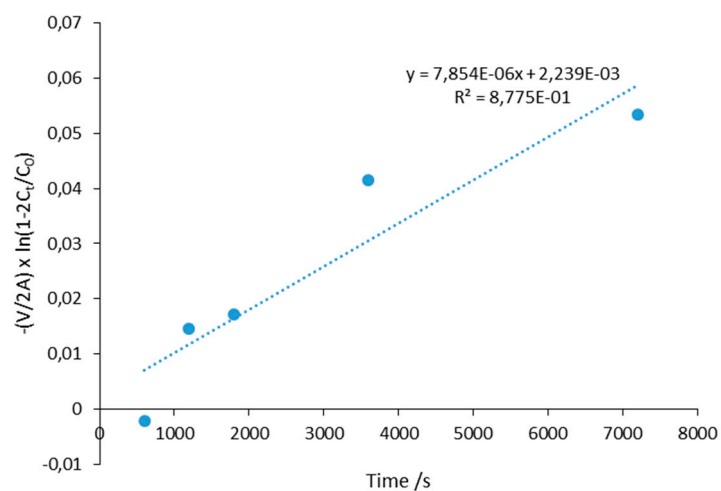

**Figure S30.** Plot of  $-(V/2A) \times \ln(1-2C_t/C_0)$  versus time (s) of [MFLH][MsO].

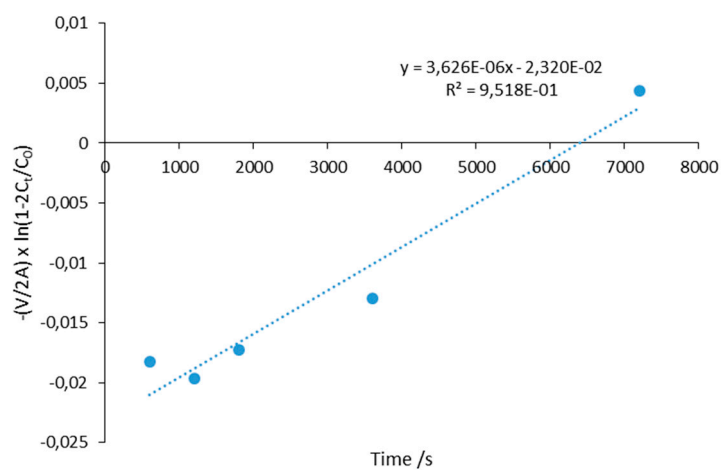

**Figure S31.** Plot of  $-(V/2A) \times \ln(1-2C_t/C_0)$  versus time (s) of [MFLH][(1S)-CSA].

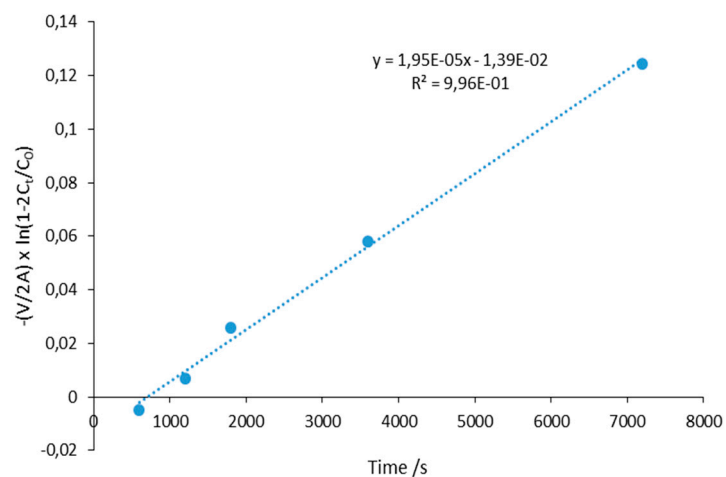

**Figure S32.** Plot of  $-(V/2A) \times \ln(1-2C_t/C_0)$  versus time (s) of [MFLH][(1R)-CSA].

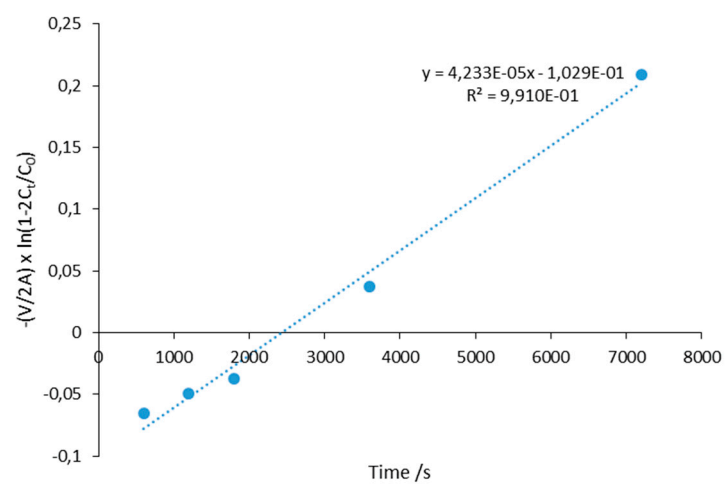

**Figure S33.** Plot of  $-(V/2A) \times \ln(1-2C_t/C_0)$  versus time (s) of [MFLH][TsO].

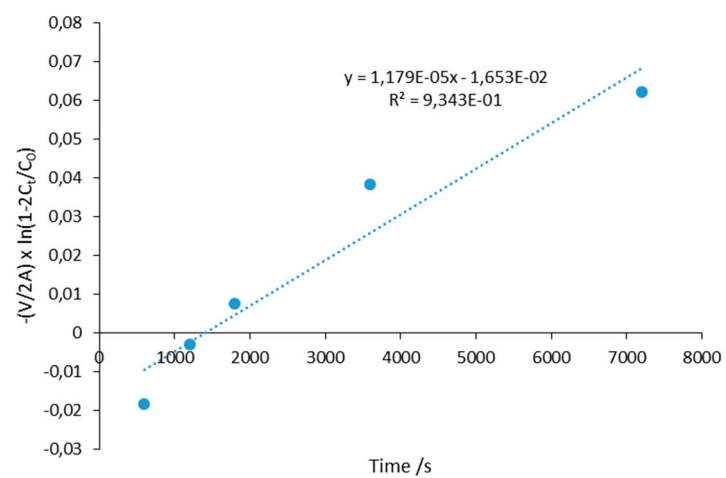

**Figure S34.** Plot of  $-(V/2A) \times \ln(1-2C_t/C_0)$  versus time (s) of [MFLH][Sac].

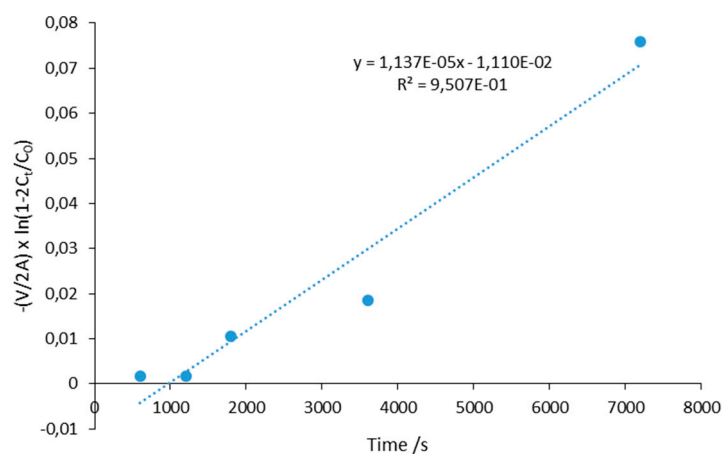

**Figure S35.** Plot of  $-(V/2A) \times \ln(1-2C_t/C_0)$  versus time (s) of [MFLH][HEPES].

*Antimycobacterial activity studies*

**Table S1.** Minimum inhibitory concentrations (MIC) of the anions as sodium salts.

| Salts      | MIC ( $\mu$ M) |
|------------|----------------|
| Na[AOT]    | > 350          |
| Na[MsO]    | > 350          |
| Na[1R-CSA] | > 350          |
| Na[1S-CSA] | > 350          |
| Na[Sac]    | > 350          |
| Na[TsO]    | > 350          |
| Na[HEPES]  | > 350          |

*Cytotoxicity assays*

Table S2. Data of the cellular viability of macrophage Raw 264.7 cells by the MTT assay of [MFLH][Cl], MFL salts and corresponding sodium salts.

| Compounds                 | % Cell Viability (CV)/Dose ( $\mu$ M) |      |      |
|---------------------------|---------------------------------------|------|------|
|                           | 15                                    | 30   | 60   |
| [MFLH][Cl]                | 100                                   | 100  | 100  |
| [MFLH][AOT]               | 100                                   | 74.7 | 50.6 |
| [MFLH][MsO]               | 70.0                                  | 38.7 | 13.2 |
| [MFLH][(1 <i>R</i> )-CSA] | 97.1                                  | 34.9 | 32.2 |
| [MFLH][(1 <i>S</i> )-CSA] | 100                                   | 88.1 | 58.0 |
| [MFLH][Sac]               | 100                                   | 36.5 | 17.1 |
| [MFLH][TsO]               | 100                                   | 98.2 | 68.3 |
| [MFLH][HEPES]             | 44.4                                  | 34.5 | 24.9 |
| Na[AOT]                   | 100                                   | 100  | 100  |
| Na[MsO]                   | 100                                   | 100  | 100  |
| Na[(1 <i>R</i> )-CSA]     | 100                                   | 100  | 100  |
| Na[(1 <i>S</i> )-CSA]     | 100                                   | 100  | 100  |
| Na[Sac]                   | 100                                   | 95.9 | 34.8 |
| Na[TsO]                   | 100                                   | 100  | 92.5 |
| Na[HEPES]                 | 100                                   | 100  | 100  |
